# Supplementary material for: Interactive Visual Displays for Interpreting the Results of Clinical Trials: Formative Evaluation With Case Vignettes
Source: PubMed Central journal article supplement (PMC6037946; doi:10.2196/10507), 2018-06-25
Supplement: jmir_v20i6e10507_app1.pdf [file jmir_v20i6e10507_app1.pdf]

**Table A1.** Evaluation participants

| ID | Gender | Clinical role | Specialty                        | Years of practice |
|----|--------|---------------|----------------------------------|-------------------|
| 1  | F      | Resident      | Family Practice                  | 2                 |
| 2  | F      | Resident      | Family Medicine                  | 2                 |
| 3  | M      | Resident      | Family Medicine                  | 1                 |
| 4  | F      | Resident      | Family Medicine                  | 3                 |
| 5  | F      | Resident      | Family Practice                  | 2.75              |
| 6  | M      | Attending     | Anesthesiology                   | 5                 |
| 7  | F      | Attending     | Cardiology                       | 10                |
| 8  | M      | Resident      | Emergency Medicine               | 4                 |
| 9  | M      | Attending     | Internal medicine hospitalist    | 15                |
| 10 | M      | Attending     | Internal Medicine                | 21                |
| 11 | M      | Resident      | Family Medicine                  | 2                 |
| 12 | F      | Resident      | Family Medicine                  | 3                 |
| 13 | F      | Resident      | Family Medicine                  | 2                 |
| 14 | M      | Resident      | Family Medicine                  | 2.75              |
| 15 | M      | Attending     | Internal medicine and pediatrics | 13                |
| 16 | M      | Resident      | Internal Medicine                | 1                 |
| 17 | M      | Resident      | Internal Medicine                | 1                 |
| 18 | M      | Attending     | Nephrology/Int Med               | 43                |
| 19 | F      | Attending     | Internal medicine                | 24                |
| 20 | F      | Attending     | Geriatrics                       | 17                |

**Table A2.** Open-ended comments and category

| Comments                                                                                                                                                                                                                                                                                                                                                                | Category                                                                                   |
|-------------------------------------------------------------------------------------------------------------------------------------------------------------------------------------------------------------------------------------------------------------------------------------------------------------------------------------------------------------------------|--------------------------------------------------------------------------------------------|
| The legends and keys for the bar graphs are a little hard to see, it seems they require dragover with the cursor, it would be nice if they were clearly displayed so I knew what the bars meant intuitively.                                                                                                                                                            | Request for clearer display                                                                |
| Provide serial numbers in the first column. (I) will be happy to be involved in further refining this tool later as well.                                                                                                                                                                                                                                               | Request for more information                                                               |
| Make sure things all show up appropriately: in the DM interactive visual display the side effect UTI-female was two tabs so different studies had their results show up under different tabs instead of showing up together and being comparable. It was a really cool comparison tool! It would be great if it were possible to compare more than 4 studies at a time. | 1) Great tool; 2) Allow more than 4 studies for comparison; 3) Request for clearer display |
| It would be nice to have a select all or de-select all check boxes on the left-hand side.                                                                                                                                                                                                                                                                               | Request for more features                                                                  |

|                                                                                                                                                                                                                                                                                                                                                                                                                                             |                                                                                                        |
|---------------------------------------------------------------------------------------------------------------------------------------------------------------------------------------------------------------------------------------------------------------------------------------------------------------------------------------------------------------------------------------------------------------------------------------------|--------------------------------------------------------------------------------------------------------|
| It was very effective as a clinical tool. I cannot think of any improvements.                                                                                                                                                                                                                                                                                                                                                               | Great tool                                                                                             |
| It was great, I can imagine using this tool all the time in my practice!                                                                                                                                                                                                                                                                                                                                                                    | Great tool                                                                                             |
| It is awesome! Maybe a way to display more RCTs at once with the comparison tools.                                                                                                                                                                                                                                                                                                                                                          | 1) Great tool; 2) Allow more than 4 studies for comparison<br>Allow more than 4 studies for comparison |
| Include more than 4 studies at a time                                                                                                                                                                                                                                                                                                                                                                                                       | comparison                                                                                             |
| I would have liked to see error bars on some of the graphs. In these vignettes, the 10 studies were provided, but how will you propose coming up with those 10 studies in real-life clinical practice?                                                                                                                                                                                                                                      | Request for more information                                                                           |
| I think that it would be nice to make graphical comparisons of more than 4 studies at once if need be                                                                                                                                                                                                                                                                                                                                       | Allow more than 4 studies for comparison                                                               |
| I am very familiar with abstract format, so I think that is why I liked PubMed. I question whether the right trials were included in interactive visual display. I have control over this is PubMed search. A quick link to the right clinical guidelines may be more helpful than the actual RCTs because I know the process by which that data is vetted for accuracy and I know I would practicing in accordance with current standards. | Prefer narrative abstracts in PubMed                                                                   |
| great tool, less incentive to read methods and figure out the validity of a study as the results are prominently displayed but could easily do. if simple validity criteria are available that would be really something.                                                                                                                                                                                                                   | 1) Great tool; 2) Request for more information                                                         |
| Continue to maintain easy use of the tool.                                                                                                                                                                                                                                                                                                                                                                                                  | Great tool                                                                                             |
| Allow the option to select more than 4 trials which will give a better view overall. Put select all option in the right-hand corner to quickly deselect all selected options                                                                                                                                                                                                                                                                | 1) Allow more than 4 studies for comparison; 2) Request for more features                              |

**Table A3.** Correlation analysis between *years of expertise, tool presentation order, clinical role, experience with literature search, experience with cases in the domain of the vignettes* and perception variables

|                        |                     | <i>Years of<br/>expertise</i> | <i>Tool<br/>presentatio<br/>n order</i> | <i>Clinical<br/>role</i> | <i>Experience with<br/>cases in the<br/>domain of the<br/>vignettes</i> | <i>Experience with<br/>literature search</i> |
|------------------------|---------------------|-------------------------------|-----------------------------------------|--------------------------|-------------------------------------------------------------------------|----------------------------------------------|
| <i>Efficiency</i>      | Pearson Correlation | 0.124                         | -0.189                                  | -0.218                   | 0.011                                                                   | -0.112                                       |
|                        | Sig. (2-tailed)     | 0.623                         | 0.439                                   | 0.371                    | 0.965                                                                   | 0.659                                        |
|                        | N                   | 18                            | 19                                      | 19                       | 18                                                                      | 18                                           |
| <i>Effectiveness</i>   | Pearson Correlation | 0.212                         | -0.191                                  | -0.079                   | -0.007                                                                  | -0.195                                       |
|                        | Sig. (2-tailed)     | 0.384                         | 0.42                                    | 0.742                    | 0.977                                                                   | 0.423                                        |
|                        | N                   | 19                            | 20                                      | 20                       | 19                                                                      | 19                                           |
| <i>Effort</i>          | Pearson Correlation | 0.086                         | -0.254                                  | -0.193                   | -0.041                                                                  | -0.116                                       |
|                        | Sig. (2-tailed)     | 0.728                         | 0.281                                   | 0.415                    | 0.869                                                                   | 0.637                                        |
|                        | N                   | 19                            | 20                                      | 20                       | 19                                                                      | 19                                           |
| <i>User Experience</i> | Pearson Correlation | 0.359                         | -0.125                                  | -0.028                   | 0.055                                                                   | -0.167                                       |
|                        | Sig. (2-tailed)     | 0.144                         | 0.611                                   | 0.909                    | 0.829                                                                   | 0.507                                        |
|                        | N                   | 18                            | 19                                      | 19                       | 18                                                                      | 18                                           |
| <i>Preference</i>      | Pearson Correlation | 0.166                         | -0.177                                  | -0.269                   | -0.016                                                                  | -0.143                                       |
|                        | Sig. (2-tailed)     | 0.497                         | 0.456                                   | 0.251                    | 0.947                                                                   | 0.559                                        |
|                        | N                   | 19                            | 20                                      | 20                       | 19                                                                      | 19                                           |

Free full text

Full text

PubMed Commons

Reader comments

Trending articles

Publication dates

5 years

10 years

Custom range...

Species

Humans

Other Animals

[Clear all](#)

[Show additional filters](#)

[Efficacy and safety of liraglutide versus sitagliptin, both in combination with metformin, in Chinese patients with type 2 diabetes: a 26-week, open-label, randomized, active comparator clinical trial.](#)

1. Zang L, Liu Y, Geng J, Luo Y, Bian F, Lv X, Yang J, Liu J, Peng Y, Li Y, Sun Y, Bosch-Traberg H, Mu Y. *Diabetes Obes Metab.* 2016 Aug;18(8):803-11. doi: 10.1111/dom.12674. Epub 2016 May 20. PMID: 27060930 [Free PMC Article](#) [Similar articles](#)

[Efficacy and safety of linagliptin co-administered with low-dose metformin once daily versus high-dose metformin twice daily in treatment-naïve patients with type 2 diabetes: a double-blind randomized trial.](#)

2. Ji L, Zinman B, Patel S, Ji J, Bailes Z, Thiemann S, Seck T. *Adv Ther.* 2015 Mar;32(3):201-15. doi: 10.1007/s12325-015-0195-3. Epub 2015 Mar 25. PMID: 25805187 [Free PMC Article](#) [Similar articles](#)

[Combination of empagliflozin and linagliptin as second-line therapy in subjects with type 2 diabetes inadequately controlled on metformin.](#)

3. DeFronzo RA, Lewin A, Patel S, Liu D, Kaste R, Woerle HJ, Broedl UC. *Diabetes Care.* 2015 Mar;38(3):384-93. doi: 10.2337/dc14-2364. Epub 2015 Jan 12. Erratum in: *Diabetes Care.* 2015 Jun;38(6):1173. PMID: 25583754 [Similar articles](#)

[Twice-daily dapagliflozin co-administered with metformin in type 2 diabetes: a 16-week randomized, placebo-controlled clinical trial.](#)

4. ...

**Search details**

24199686[uid] OR 22413962[uid] OR 25200570[uid] OR 27060930[uid] OR 24186878[uid] OR 24026211[uid] OR 23604551[uid] OR 24965700[uid] OR 25805187[uid] OR 25583754[uid]

Search See more...

---

**Recent Activity** [Turn Off](#) [Clear](#)

Q 24199686 22413962 25200570 27060930 24186878 24026211 23604551 24... PubMed

Maintenance of Clinical and Radiographic Benefit With Intravenous Golimumab PubMed

Q 18593759 15529377 24907147 25050591 25769495 16385520 24550168 26... PubMed

Q 26486166[uid] (1) PubMed

Effect of Switching From Statin Monotherapy to Ezetimibe/Simvastat PubMed

See more...

**Figure A1.** PubMed® default search results display with four trials on various treatments for diabetes mellitus (<https://www.ncbi.nlm.nih.gov/pubmed/?term=25200570+27060930+25805187+25583754%5Buid%5D>)

|                                             |                                                                                                                                                                  |                                                                                                                                                                                                                  |                                                                                                                                                            |                                                                                                                                                                                                                                           |
|---------------------------------------------|------------------------------------------------------------------------------------------------------------------------------------------------------------------|------------------------------------------------------------------------------------------------------------------------------------------------------------------------------------------------------------------|------------------------------------------------------------------------------------------------------------------------------------------------------------|-------------------------------------------------------------------------------------------------------------------------------------------------------------------------------------------------------------------------------------------|
|                                             | <a href="#">Radiographic changes in rheumatoid arthritis patients attaining different disease activity states with methotrexate mono... [Ann Rheum Dis 2009]</a> | <a href="#">Combination of infliximab and methotrexate therapy for early rheumatoid arthritis... [Arth &amp; Rheumat 2004]</a>                                                                                   | <a href="#">Short-term efficacy of etanercept plus methotrexate vs combinations of disease-modifying anti-rheumatic drugs with metho... [Rheumat 2014]</a> | <a href="#">Infliximab efficacy in rheumatoid arthritis after an inadequate response to etanercept or adalimumab... [CMRO 14]</a>                                                                                                         |
| <b>POPULATION</b>                           |                                                                                                                                                                  |                                                                                                                                                                                                                  |                                                                                                                                                            |                                                                                                                                                                                                                                           |
| Inclusion Criteria                          | Active early rheumatoid arthritis (RA) <= 3 years                                                                                                                | Active early RA <= 3 years                                                                                                                                                                                       | Active early RA <= 3 years on Methotrexate                                                                                                                 | Active RA despite methotrexate + etanercept/adalimumab                                                                                                                                                                                    |
| Sample Size (completed/randomized (%))      | 1049/1049 (100%)                                                                                                                                                 | 1004/1049 (96%)                                                                                                                                                                                                  | 723/723 (100%)                                                                                                                                             | 197/203 (97%)                                                                                                                                                                                                                             |
| <b>INTERVENTION</b>                         |                                                                                                                                                                  |                                                                                                                                                                                                                  |                                                                                                                                                            |                                                                                                                                                                                                                                           |
| Arm 1                                       | Placebo + methotrexate (MTX)                                                                                                                                     | Placebo + MTX                                                                                                                                                                                                    | conventional synthetic DMARDs (csDMARDs) + MTX                                                                                                             | Infliximab                                                                                                                                                                                                                                |
| Arm 2                                       | MTX + Infliximab 3mg/kg or Infliximab 6 mg/kg (pooled)                                                                                                           | MTX + Infliximab 3mg/kg                                                                                                                                                                                          | etanercept (ETN) + MTX                                                                                                                                     |                                                                                                                                                                                                                                           |
| Arm 3 <a href="#">more</a>                  |                                                                                                                                                                  | MTX + Infliximab 6mg/kg                                                                                                                                                                                          | hydroxychloroquine (HCQ) + MTX                                                                                                                             |                                                                                                                                                                                                                                           |
| <b>RESULTS (Efficacy Chart)</b>             |                                                                                                                                                                  |                                                                                                                                                                                                                  |                                                                                                                                                            |                                                                                                                                                                                                                                           |
| % of patients with DAS28<2.6                |                                                                                                                                                                  |                                                                                                                                                                                                                  |                                                                                                                                                            |                                                                                                                                                                                                                                           |
| % of patients with CDAI<2.8                 |                                                                                                                                                                  |                                                                                                                                                                                                                  |                                                                                                                                                            |                                                                                                                                                                                                                                           |
| % of patients with SDAI<3.3                 |                                                                                                                                                                  |                                                                                                                                                                                                                  |                                                                                                                                                            |                                                                                                                                                                                                                                           |
| Conclusion                                  | MTX + Infliximab inhibits radiographic progression across all disease activity states. <a href="#">more</a>                                                      | For patients with active RA in its early stages, combination therapy with MTX and infliximab provides greater clinical, radiographic, and functional benefits than treatment with MTX alone <a href="#">more</a> | Overall, ETN + MTX was more effective in treating subjects with established RA than csDMARDs + MTX at 16 weeks. <a href="#">more</a>                       | Infliximab, in treat-to-target settings with individual dose escalation, demonstrated significant efficacy at Weeks 10 and 26 in patients switched to infliximab after inadequate response to etanercept/adalimumab. <a href="#">more</a> |
| <b>ADVERSE EFFECTS (Side Effects Chart)</b> |                                                                                                                                                                  |                                                                                                                                                                                                                  |                                                                                                                                                            |                                                                                                                                                                                                                                           |
| Overall Adverse Effect (AE) (%)             |                                                                                                                                                                  |                                                                                                                                                                                                                  |                                                                                                                                                            |                                                                                                                                                                                                                                           |
| Most Common AE (%)                          |                                                                                                                                                                  | <br>● Upper Respiratory Infection                                                                                                                                                                                |                                                                                                                                                            | <br>● Infections                                                                                                                                                                                                                          |

Figure A2. Comparison table display for rheumatoid arthritis RCTs

**Case Vignettes**

### ***Acute Coronary Syndrome***

A 56-year-old Chinese patient, Mr. Lee presents to the Emergency room with symptoms of acute coronary syndrome. He is seen by a resident who notices an elevated lipid profile. He says that he is on some lipid lowering therapy but more details are not available. The resident wants to find out the best lipid lowering therapy that he could start Mr. Lee on, in this situation.

Which lipid lowering drug should the resident choose?

***Clinical Trial Studies PMID:*** 26486166 and 25879728.

### ***Rheumatoid Arthritis***

Mary is a 34-year-old Caucasian woman diagnosed with rheumatoid arthritis (RA). Her initial treatment was methotrexate (MTX) 15 mg/wk orally for 4 weeks, with escalation to 20 mg/wk for another 4 weeks, and then a maintenance dose of subcutaneous MTX 25 mg/wk.

At the 6-month follow-up visit, she reports an improved overall assessment of disease activity. However, she is still experiencing some morning stiffness and functional limitations. Inflammation of joints in her hands has resulted in a loss of the ability to work. Radiographic results indicated several erosions of MCPs in each hand; her ESR was 39 mm/h and C-reactive protein (CRP) was 3.3 mg/dL. She had 8 tender and 11 swollen joints, and the disease activity score (DAS28) was 5.76, indicative of high disease activity.

The rheumatologist decides to enhance the current treatment of MTX monotherapy and considers the options of adding an additional disease-modifying antirheumatic drug (DMARD). The ideal drug of choice for Mary would one that would increase her function, reduce disease activity, and reduces radiological disease progression, while minimizing the possibility of adverse reactions.

***Clinical Trial Studies PMID:*** 18593759, 15529377, 24907147, 25050591, 25769495, 16385520, 24550168, 26063454, 24670196 and 25623393.

### ***Diabetes Mellitus***

Agnes is a 51-year-old female with hypertension who received a diagnosis of type 2 diabetes a decade ago. She has been worried about her diabetes since then because she has not been able to gain

complete control over it. Her HbA1c was 7.0% for 1 year but gradually increased to 9.0%. For the past 2 years, she has been taking metformin 2000 mg daily. She is maintaining her weight at 165 pounds (75 kg), but she is not able to lose weight. Agnes goes to the gym and walks on a treadmill three times a week. She tells you that she has made as many lifestyle changes as she can. Agnes' hypertension is well controlled with an ACE inhibitor; she also takes a statin. Her most recent tests showed LDL cholesterol of 85 mg / dL and HDL of 62 mg / dL.

Agnes hates needles and won't use insulin. Her sister, who also has diabetes, was receiving glipizide but had episodes of hypoglycemia while taking that drug, including one episode that resulted in an auto accident. Agnes is also worried about weight gain associated with that drug. Her sister recently switched from glipizide to saxagliptin and has had no further episodes of hypoglycemia. Agnes has also heard about a new type of drug that works by eliminating excess glucose through the urine. She wants to know about the safety of the newer drugs. You explain to her that the drugs she is asking about are in different classes - dipeptidyl peptidase 4 (DPP-4) inhibitors ("gliptins") and sodium glucose cotransporter 2 (SGLT2) inhibitors ("gliflozins").

Do you think a second drug should be added to the metformin Agnes is currently receiving? If so, what drug?

**Clinical Trial Studies PMID:** 24199686, 22413962, 25200570, 27060930, 24186878, 24026211, 23604551, 24965700, 25805187 and 25583754.

### **Post Evaluation Survey**

#### **Demographic questions**

|                                                   | <b>*FREE TEXT</b> |
|---------------------------------------------------|-------------------|
| Specialty                                         |                   |
| Years of practice since medical school graduation |                   |

**Please indicate how much % of your time do you typically dedicate to each of the following activities:**

|                   | Less than<br>25% | 25 to 50 % | 50 to 75% | More than<br>75% |
|-------------------|------------------|------------|-----------|------------------|
| Clinical practice |                  |            |           |                  |
| Research          |                  |            |           |                  |
| Clinical teaching |                  |            |           |                  |

**Please rate your experience according to the items below**

**CLINICAL**

|                                                                                                                         | Little<br>experience |   |   |   | Strong<br>experience |
|-------------------------------------------------------------------------------------------------------------------------|----------------------|---|---|---|----------------------|
|                                                                                                                         | 1                    | 2 | 3 | 4 | 5                    |
| Dealing with patients in the same clinical domain of the narrative abstracts case vignette                              |                      |   |   |   |                      |
| Dealing with cases with similar clinical complexity as in the case presented in the narrative abstracts vignette        |                      |   |   |   |                      |
| Dealing with patients in the clinical domain of the interactive visual display case vignette                            |                      |   |   |   |                      |
| Dealing with cases with similar clinical complexity as in the case presented in the interactive visual display vignette |                      |   |   |   |                      |

**TECHNICAL**

|                                                                                         | Little<br>experience |   |   |   | Strong<br>experience |
|-----------------------------------------------------------------------------------------|----------------------|---|---|---|----------------------|
|                                                                                         | 1                    | 2 | 3 | 4 | 5                    |
| Experience in using computers for work activities                                       |                      |   |   |   |                      |
| Experience in using medical literature search tools in general (e.g., PubMed, UpToDate) |                      |   |   |   |                      |
| Experience in using PubMed for medical literature search                                |                      |   |   |   |                      |





## Open comments

|                                                                            | <b>*FREE TEXT</b> |
|----------------------------------------------------------------------------|-------------------|
| Please give your suggestions for improving the interactive visual displays |                   |
